# Supplementary material for: Enhanced photoelectrochemical water oxidation performance by altering the interfacial charge transfer path
Source: Royal Society of Chemistry journal article supplement (doi:10.1039/c7qi00211d), 2017-01-01
Supplement: c7qi00211d1.pdf [file c7qi00211d1.pdf]

## Supporting information

### **Enhanced Photoelectrochemical Water Oxidation Performance by Altering Interfacial Charge Transfer path**

Dandan Xu,<sup>‡b,c</sup> Qijing Bu<sup>‡a</sup> Dejun Wang,<sup>a</sup> Tengfeng Xie<sup>\*a</sup>.

a College of Chemistry, Jilin University, Changchun 130012, People's Republic of China. E-mail:  
xietf@jlu.edu.cn

b Key Laboratory of Photochemical Biomaterials and Energy Storage Materials, Heilongjiang  
Province, People's Republic of China.

c College of Chemistry and Chemical Engineering, Harbin Normal University, Harbin 150028,  
People's Republic of China.

<sup>‡</sup>These authors contributed equally to this work.

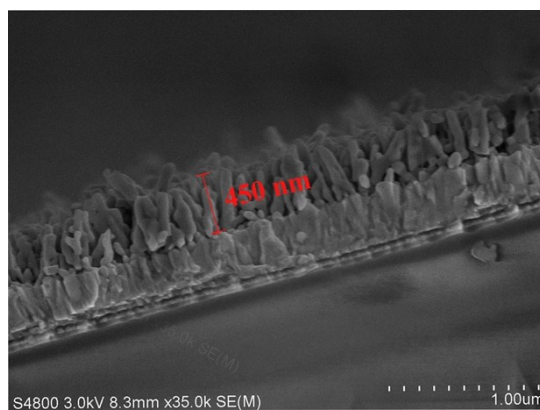

Figure S1 Cross-sectional SEM of Ti-doped  $\text{Fe}_2\text{O}_3$  photoanode.

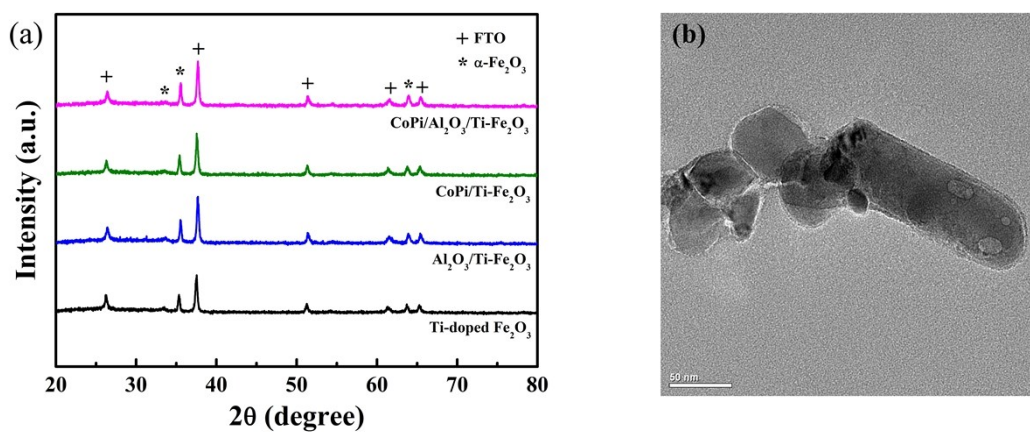

Figure S2 (a) X-ray diffraction patterns of Ti-doped  $\text{Fe}_2\text{O}_3$ ,  $\text{Al}_2\text{O}_3/\text{Ti-Fe}_2\text{O}_3$ ,  $\text{CoPi}/\text{Ti-Fe}_2\text{O}_3$  and  $\text{CoPi}/\text{Al}_2\text{O}_3/\text{Ti-Fe}_2\text{O}_3$ . (b) TEM images of  $\text{CoPi}/\text{Al}_2\text{O}_3/\text{Ti-Fe}_2\text{O}_3$ .

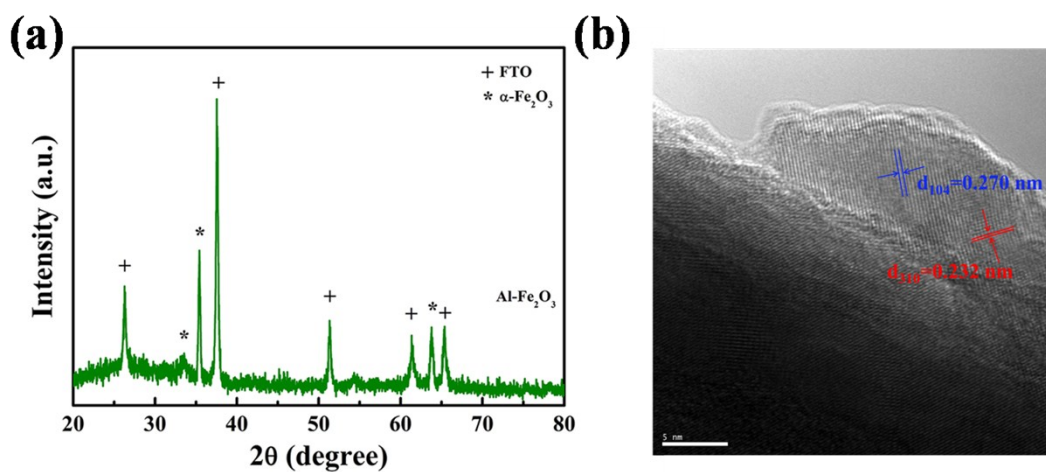

Figure S3 (a) X-ray diffraction patterns and (b) HRTEM images of Ti-doped  $\text{Fe}_2\text{O}_3$  surface treatment in the solution containing  $\text{Al}^{3+}$  more times by the same method.

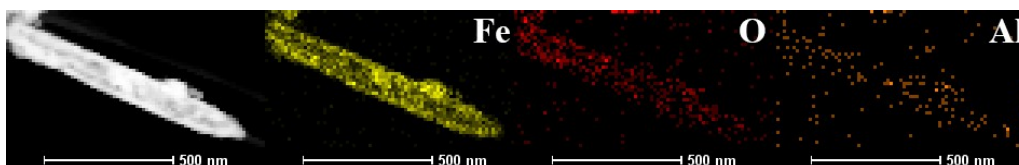

Figure S4 Elemental mapping of Fe, O and Al for Ti-doped  $\text{Fe}_2\text{O}_3$  surface treatment in the solution containing  $\text{Al}^{3+}$  more times by the same method.

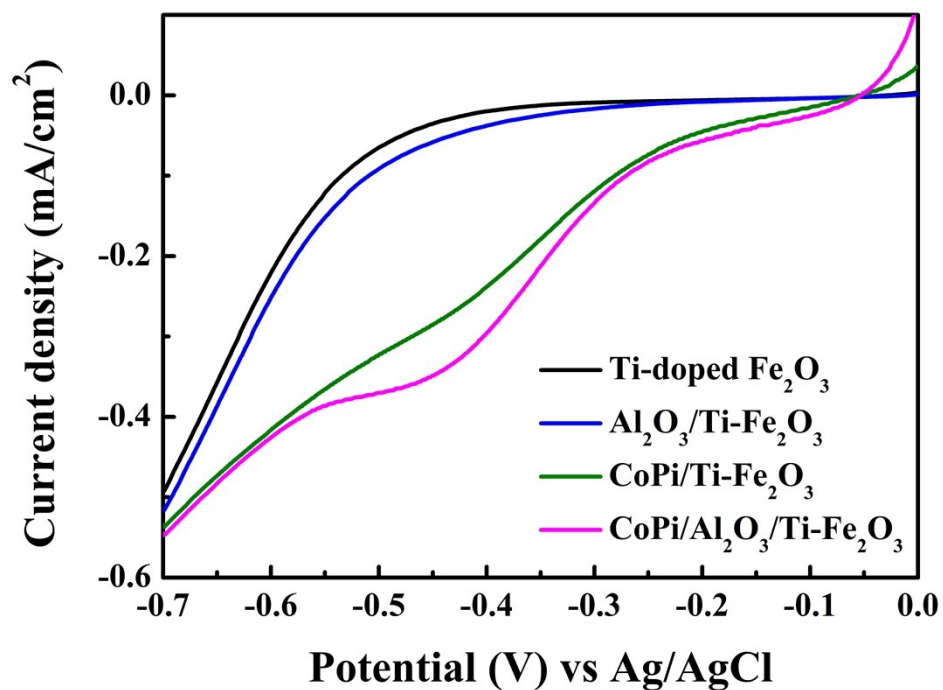

Figure S5 Cathodic currents in the dark collected for Ti-doped  $\text{Fe}_2\text{O}_3$ ,  $\text{Al}_2\text{O}_3/\text{Ti-Fe}_2\text{O}_3$ ,  $\text{CoPi}/\text{Ti-Fe}_2\text{O}_3$  and  $\text{CoPi}/\text{Al}_2\text{O}_3/\text{Ti-Fe}_2\text{O}_3$ .

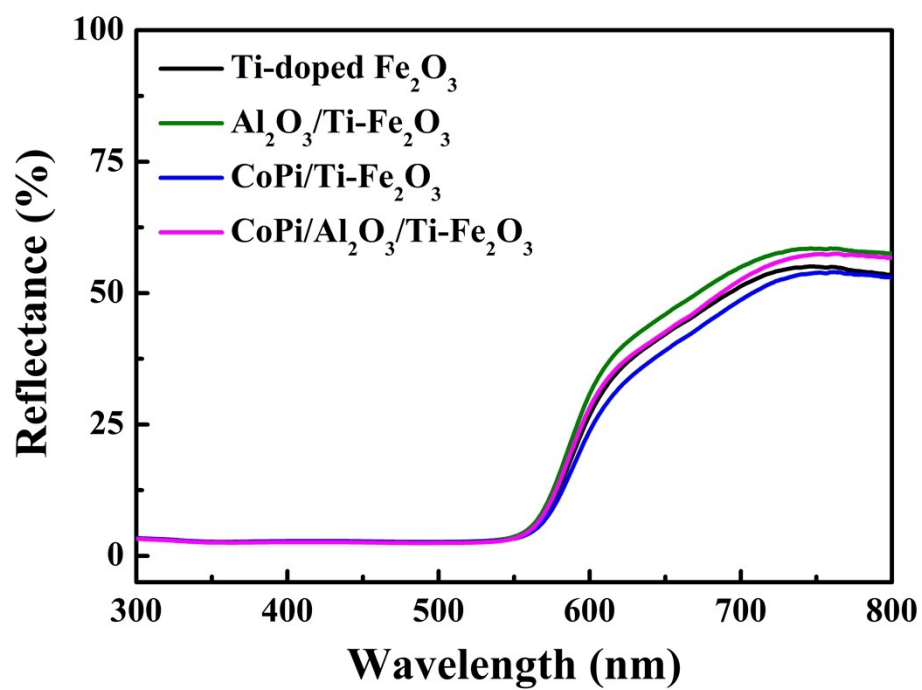

Figure S6 UV-vis diffuse reflectance spectra of Ti-doped Fe<sub>2</sub>O<sub>3</sub>, Al<sub>2</sub>O<sub>3</sub>/Ti-Fe<sub>2</sub>O<sub>3</sub>, CoPi/Ti-Fe<sub>2</sub>O<sub>3</sub> and CoPi/Al<sub>2</sub>O<sub>3</sub>/Ti-Fe<sub>2</sub>O<sub>3</sub>.
